# Supplementary material for: Synthesis of Cellulose–Poly(Acrylic Acid) Using Sugarcane Bagasse Extracted Cellulose Fibres for the Removal of Heavy Metal Ions
Source: MDPI journal article supplement (doi:10.3390/ijms24108922), 2023-05-18
Supplement: s1 [file s1]

# Supplementary information

## Synthesis of cellulose–poly(acrylic acid) using sugarcane bagasse extracted cellulose fibres for the removal of heavy metal ions

Fuchao Li, Zhemin Xie, Jianfeng Wen, Tao Tang, Li Jiang, Guanghui Hu\* and Ming Li\*

College of Science & Key Laboratory of Low-dimensional Structural Physics and Application, Education Department of Guangxi Zhuang Autonomous Region, Guilin University of Technology, Guilin 541004, China

\*Correspondence: guanghui@glut.edu.cn (G. Hu), 2006017@glut.edu.cn (M. Li).

### Swelling Capacity

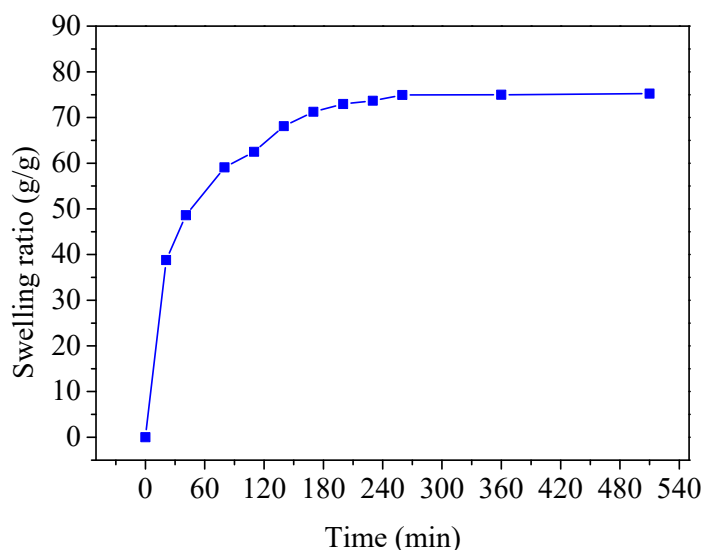

Figure S1. Swelling ratios of CE-PAANa

The swelling ratio of the sample was measured by immersing 0.2 g of hydrogel into 200 mL of water to reach equilibrium in a beaker (20 °C), and the weight of the

swollen hydrogel was measured after removing excess water which had not penetrated into the hydrogel by a mesh sieve at different contact time until equilibrium. The swelling ratio of hydrogels can be calculated as  $SR = (W_s - W_d)/W_d$ , where  $W_s$  and  $W_d$  represent the weights of swollen hydrogels and dry hydrogels, respectively.

The CE-PAANa had swelling capacity of 75 g/g in distilled water, as shown in Fig. S2. As shown in Table S1, the low swelling ratio of CE-PAANa is due to the access to a large amount of cellulose. This is because the addition of CE leads to a shrinkage of the hydrogel pores, which slows the entry of water[1, 2].

Table S1. The swelling capacity in distilled water reported for some grafted PAA

| Materials                | Equilibrium swelling ratio<br>(g·g <sup>-1</sup> ) | Ref.       |
|--------------------------|----------------------------------------------------|------------|
| Pb (II) P(AANa-co-AM)/GO | 282.2                                              | [3]        |
| HEC-g-P (AA-co-AM)       | 240                                                | [4]        |
| WS-g-P (AA-co-AM)        | 200                                                | [5]        |
| CE-PAANa                 | 75                                                 | This study |

Table S2. Gel Permeation Chromatography (GPC) test results for cellulose.

| Sample | Method        | Retention<br>time<br>(min) | GPC $M_n$<br>(g/mol) | GPC $M_w$<br>(g/mol) | GPC $M_z$<br>(g/mol) | GPC $M_{z+1}$<br>(g/mol) | GPC $M_\eta$<br>(g/mol) | Dispersity<br>$M_w/M_n$ |
|--------|---------------|----------------------------|----------------------|----------------------|----------------------|--------------------------|-------------------------|-------------------------|
| CE     | DMSO-<br>PMMA | 8.6471                     | 6678                 | 9599                 | 12973                | 16415                    | 9134                    | 1.4374                  |

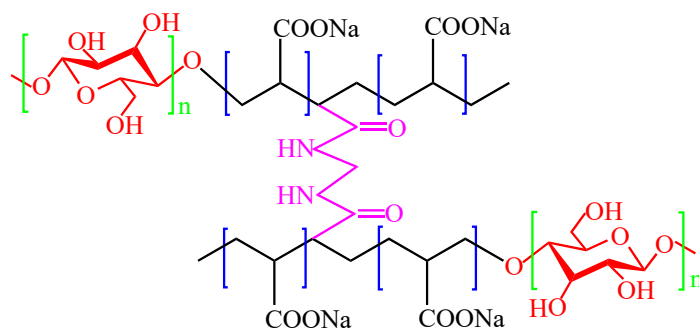

Figure S2. Schematic diagram of the structure of CE-PAANa

## References

1. Chen, Y.; Li, Q.; Li, Y.; Zhang, Q.; Huang, J.; Wu, Q.; Wang, S., Fabrication of Cellulose Nanocrystal-g-Poly(Acrylic Acid-Co-Acrylamide) Aerogels for Efficient Pb(II) Removal. In *Polymers*, 2020; Vol. 12.
2. Yu, F.; Yang, P.; Yang, Z.; Zhang, X.; Ma, J., Double-network hydrogel adsorbents for environmental applications. *Chemical Engineering Journal* **2021**, 426, 131900.
3. He, S.; Zhang, F.; Cheng, S.; Wang, W., Synthesis of Sodium Acrylate and Acrylamide Copolymer/GO Hydrogels and Their Effective Adsorption for Pb<sup>2+</sup> and Cd<sup>2+</sup>. *ACS Sustainable Chemistry & Engineering* **2016**, 4, (7), 3948-3959.
4. Sultan, M.; Nagieb, Z. A.; El-Masry, H. M.; Taha, G. M., Physically-crosslinked hydroxyethyl cellulose-g-poly (acrylic acid-co-acrylamide)-Fe<sup>3+</sup>/silver nanoparticles for water disinfection and enhanced adsorption of basic methylene blue dye. *International Journal of Biological Macromolecules* **2022**, 196, 180-193.
5. Song, J.; Zhao, H.; Zhao, G.; Xiang, Y.; Liu, Y., Novel Semi-IPN Nanocomposites with Functions of both Nutrient Slow-Release and Water Retention. 1. Microscopic Structure, Water Absorbency, and Degradation Performance. *J. Agric. Food. Chem.* **2019**, 67, (27), 7587-7597.
